# Supplementary material for: Qualitative analysis of antibody–drug conjugates (ADCs): an experimental comparison of analytical techniques of cysteine-linked ADCs
Source: Royal Society of Chemistry journal article supplement (doi:10.1039/c8an01178h), 2018-01-01
Supplement: c8an01178h1.pdf [file c8an01178h1.pdf]

## Supplementary information

### Qualitative analysis of antibody-drug conjugates (ADCs): an experimental comparison of analytical techniques of cysteine-linked ADCs

Malin Källsten<sup>1,3</sup>, Rafael Hartmann<sup>2</sup>, Konstantin Artemenko<sup>1</sup>, Sara Bergström Lind<sup>1</sup>, Fredrik Lehmann<sup>3</sup> and Jonas Bergquist<sup>1</sup>.

<sup>1</sup> Department of Chemistry-BMC, Analytical Chemistry, BMC, Uppsala University, Box 599, SE-T51 24, Uppsala, Sweden, <sup>2</sup> Department of Medicinal Chemistry, Organic Pharmaceutical Chemistry, BMC, Uppsala University, Box 574, SE-751 23 Uppsala, Sweden and <sup>3</sup> Recipharm OT Chemistry AB, Viridings allé 32b, SE-754 50, Uppsala, Sweden

#### Table of contents

|                                                                                |      |
|--------------------------------------------------------------------------------|------|
| Extra chromatograms HIC-UV/Vis (sample and blanks).....                        | p.2  |
| Extra chromatograms RPLC-MS QTOF (sample and blanks).....                      | p.4  |
| Extra chromatograms RPLC-MS Orbitrap (sample and blanks) .....                 | p.6  |
| Sample preparation for ADC with DAR 0, 6 and 8 .....                           | p.8  |
| Additional spectra for MALDI-TOF-MS samples .....                              | p.8  |
| Comparison of detected masses of all ADC batches with theoretical values ..... | p.10 |
| Mass shift upon conjugation of the different antibody chains .....             | p.10 |

### Chromatograms for HIC-UV/VIS depicting sample signal and consecutive blank runs

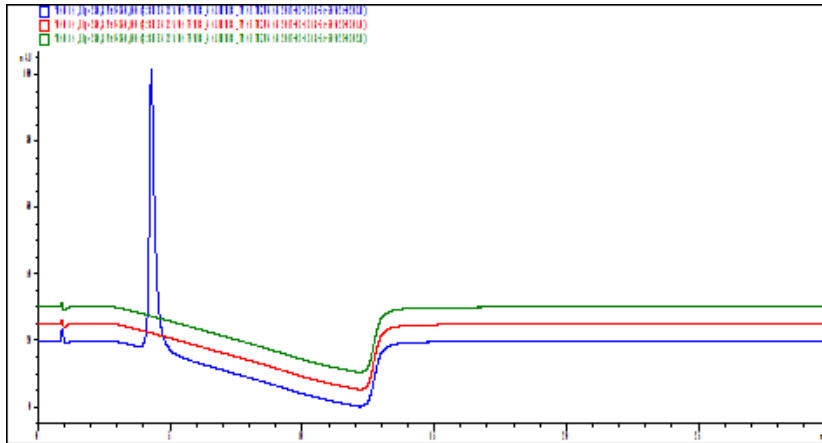

Figure S1. Chromatogram for mAb (blue) and consecutive blank runs before introduction of the next sample batch onto the column for HIC-UV/VIS.

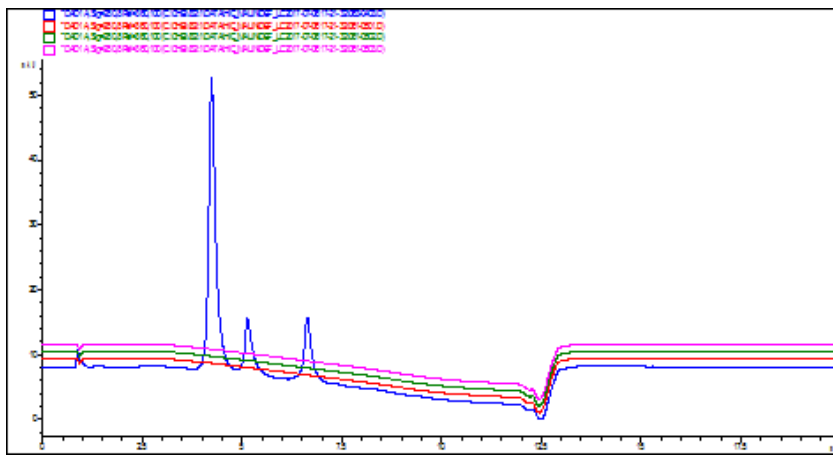

Figure S2. Chromatogram for ADC with average DAR of 1 (blue) and consecutive blank runs before introduction of the next sample batch onto the column for HIC-UV/VIS.

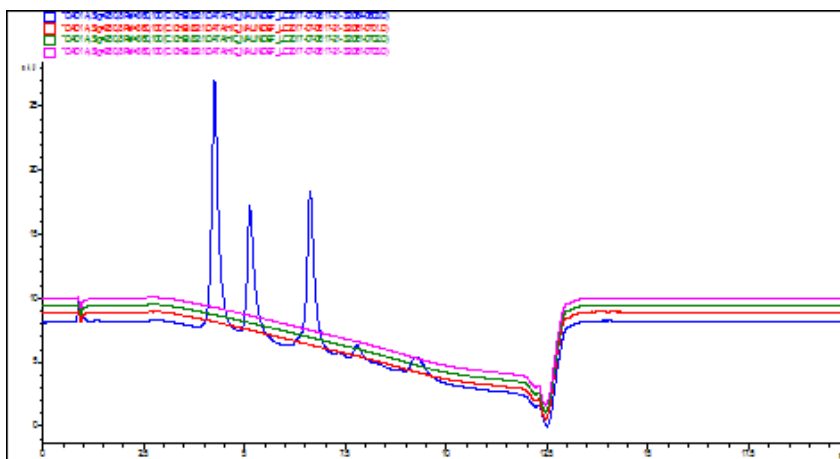

Figure S3. Chromatogram for ADC with average DAR of 2 (blue) and consecutive blank runs before introduction of the next sample batch onto the column for HIC-UV/VIS.

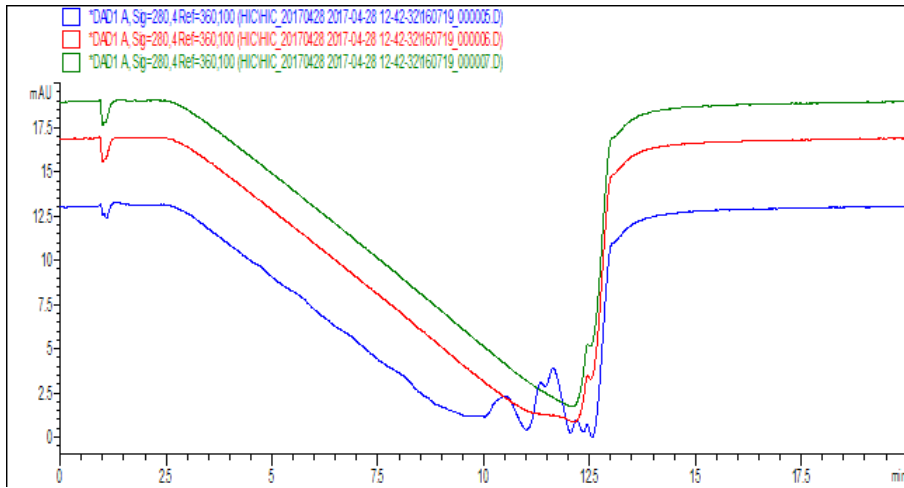

Figure S4. Chromatogram for ADC with average DAR of 6 (blue) and consecutive blank runs before introduction of the next sample batch onto the column for HIC-UV/Vis.

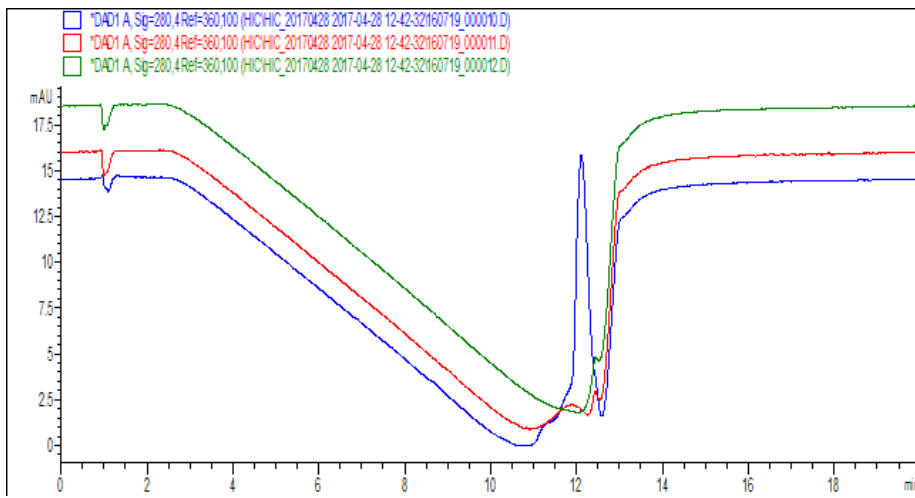

Figure S5. Chromatogram for ADC with average DAR of 8 (blue) and consecutive blank runs before introduction of the next sample batch onto the column for HIC-UV/Vis.

## Chromatograms for RPLC-MS QTOF depicting sample signal and consecutive blank runs

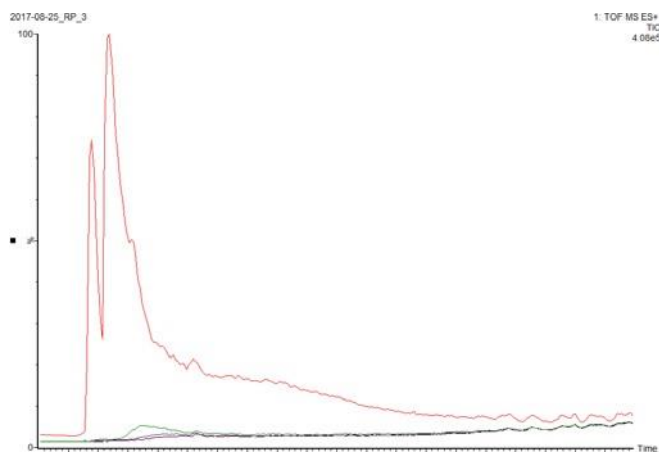

Figure S6. TIC chromatogram for mAb (red) and consecutive blank runs before introduction of the next sample batch onto the column for RPLC-MS (QToF).

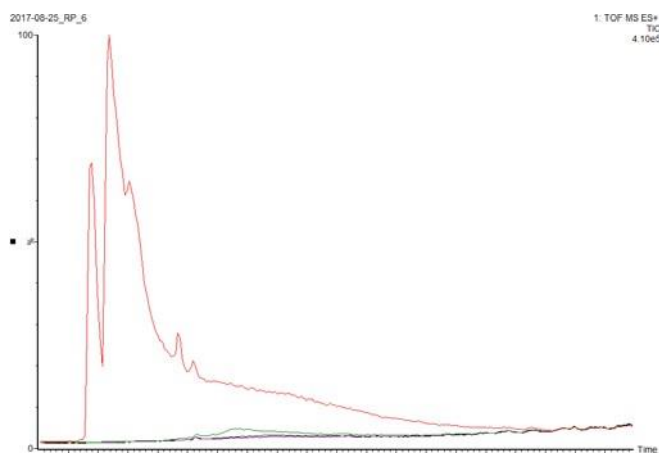

Figure S7. TIC chromatogram for ADC with average DAR of 1 (red) and consecutive blank runs before introduction of the next sample batch onto the column for RPLC-MS (QToF).

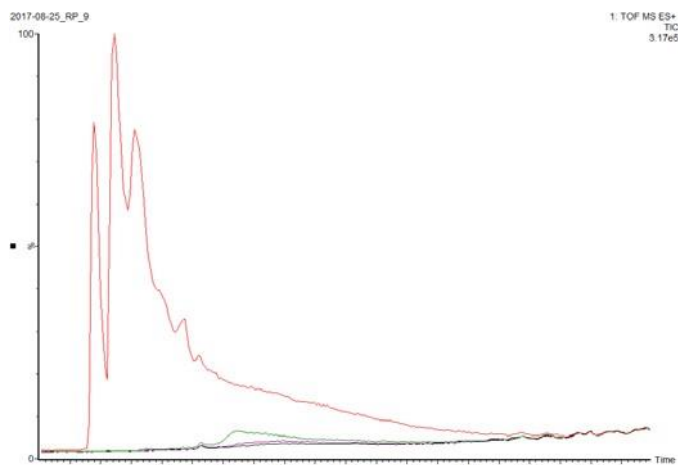

Figure S8. TIC chromatogram for ADC with average DAR of 2 (red) and consecutive blank runs before introduction of the next sample batch onto the column for RPLC-MS (QToF).

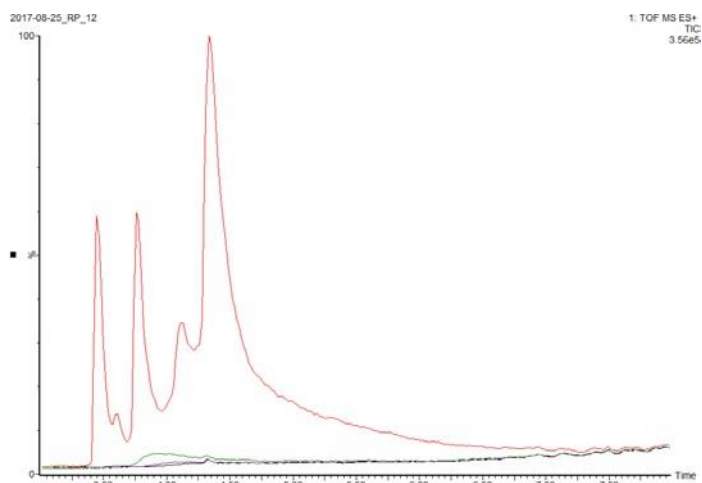

Figure S9. TIC chromatogram for ADC with average DAR of 6 (red) and consecutive blank runs before introduction of the next sample batch onto the column for RPLC-MS (QToF).

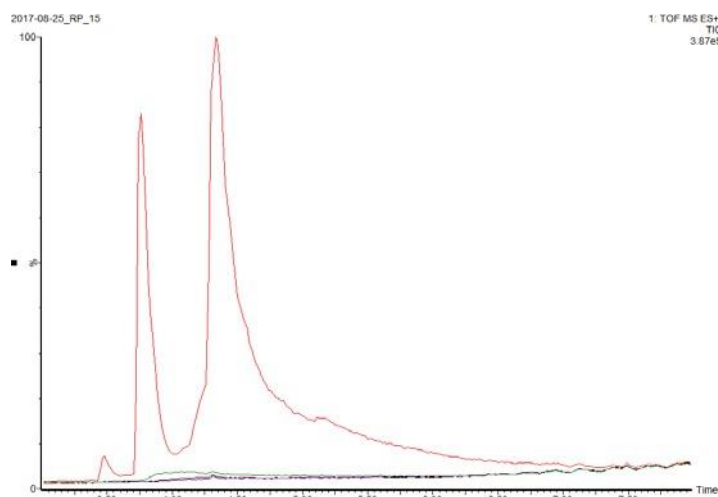

Figure S10. TIC chromatogram for ADC with average DAR of 8 (red) and consecutive blank runs before introduction of the next sample batch onto the column for RPLC-MS (QToF).

## Chromatograms for RPLC-MS Orbitrap depicting sample signal and consecutive blank runs

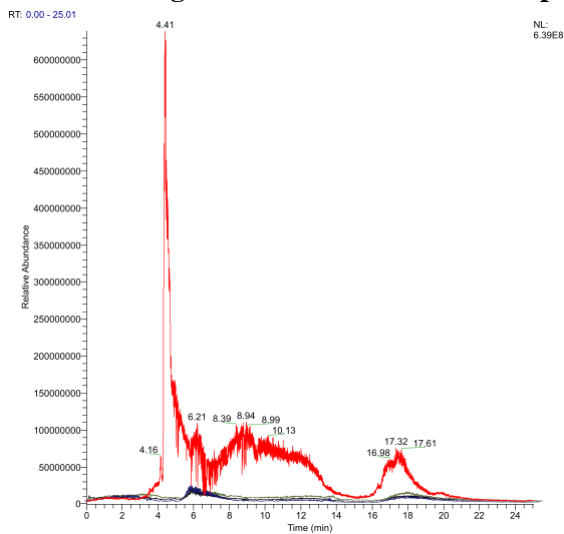

Figure S11. TIC chromatogram for mAb (red) and consecutive blank runs before introduction of the next sample batch onto the column for RPLC-MS (Orbitrap).

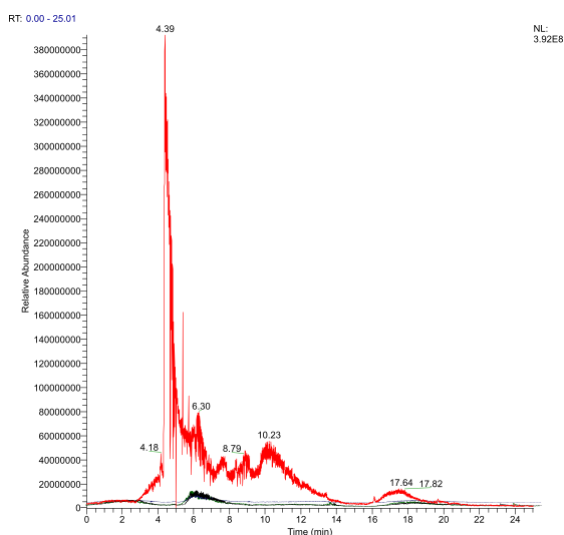

Figure S12. TIC chromatogram for ADC with average DAR of 1 (red) and consecutive blank runs before introduction of the next sample batch onto the column for RPLC-MS (Orbitrap).

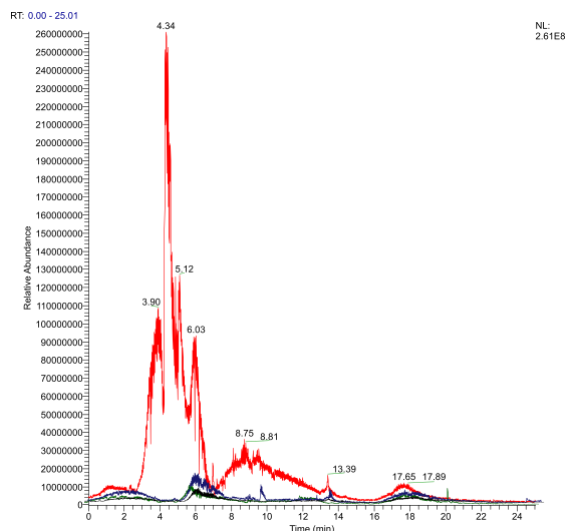

Figure S13. TIC chromatogram for ADC with average DAR of 2 (red) and consecutive blank runs before introduction of the next sample batch onto the column for RPLC-MS (Orbitrap).

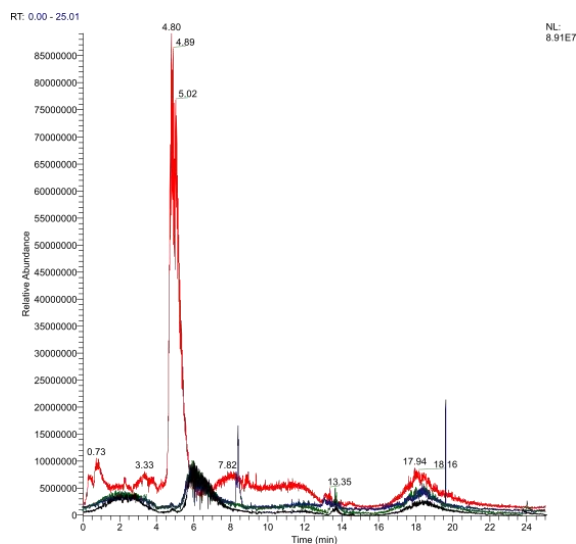

Figure S14. TIC chromatogram for ADC with average DAR of 6 (red) and consecutive blank runs before introduction of the next sample batch onto the column for RPLC-MS (Orbitrap).

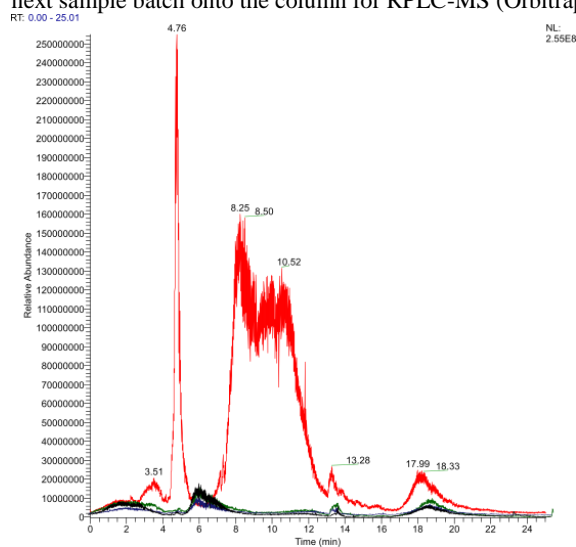

Figure S15. TIC chromatogram for ADC with average DAR of 8 (red) and consecutive blank runs before introduction of the next sample batch onto the column for RPLC-MS (Orbitrap).

## Sample preparation for sample batch mAb, high DAR and max. DAR for MALDI-TOF-MS analysis

A portion of each batch (42  $\mu\text{g}$ ) was deglycosylated by adding 2  $\mu\text{L}$  of PNGaseF (500units/mL) at 37°C and incubating for 3 hours. The interchain disulfide bonds were then reduced by addition of 4  $\mu\text{L}$  of 1M DTT followed by 4  $\mu\text{L}$  550 mM iodoacetamide (IAA) for 30 and 20 min at room temperature respectively. Finally, the samples were buffer exchanged into 200mM Ammonium acetate using Biorad's Micro Bio-spin Columns with Bio-gel P-20 (40 kDa cut-off, Tris-buffer) according to the providers protocol and the sample volumes were adjusted if needed to a final concentration of 0.5 mg/mL and stored at -20°C until analysis.

## Highest spectra for mAb, DAR 6 and 8 from MALDI samples prepared according to experimental procedure in the main text

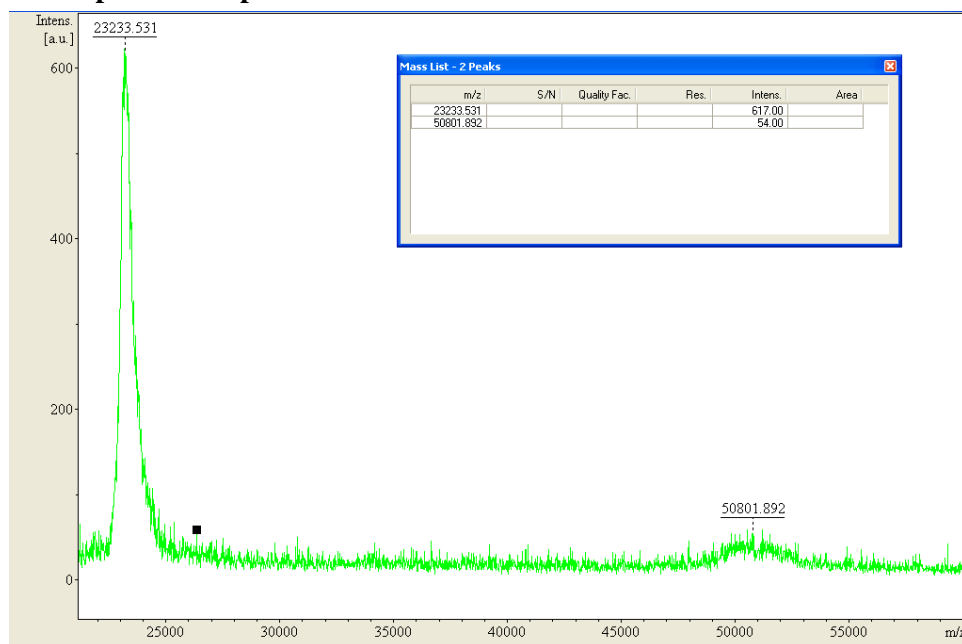

Figure S16. Highest spectra obtained for spots made from samples prepared without desalting and iodoacetamide steps for mAb.

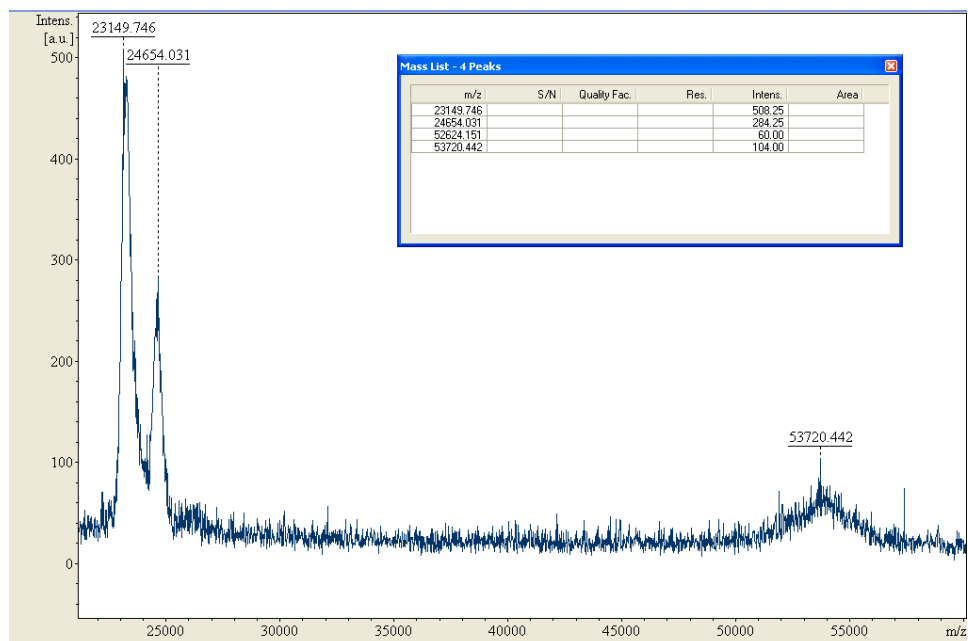

Figure S17. Highest spectra obtained for spots made from samples prepared without desalting and iodoacetamide steps for ADC with average DAR of 6.



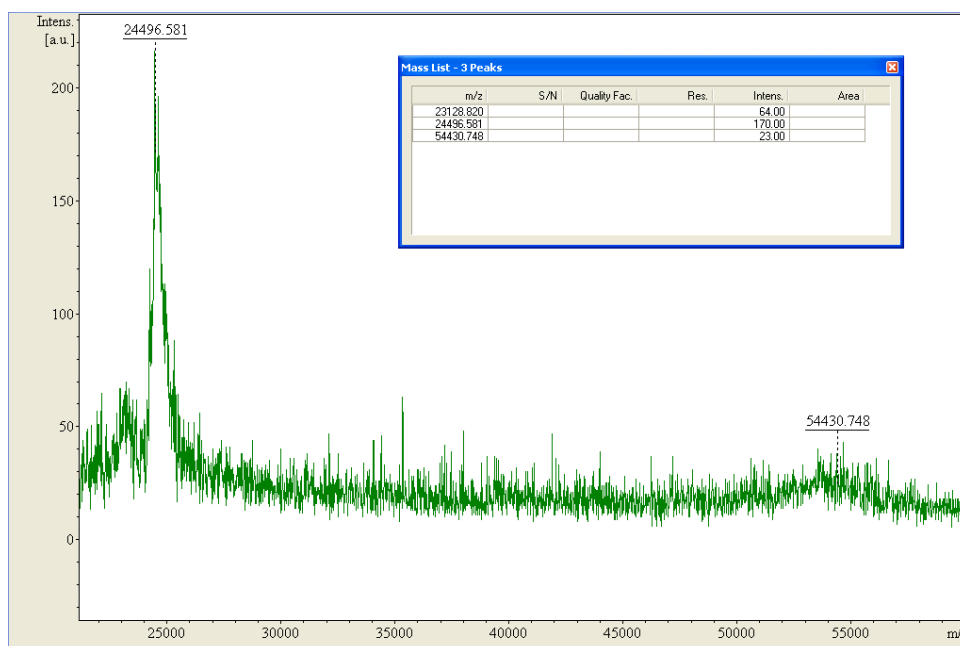

Figure S18. Highest spectra obtained for spots made from samples prepared without desalting and iodoacetamide steps for ADC with average DAR of 8.

## MALDI-TOF-MS

Table S1. Average mass, theoretical mass and deviation from theoretical mass for experimentally determined masses of LC and HC with different degrees of conjugation from triplicate runs of all five batches on a MALDI-TOF-MS. Numbers marked in red indicate a visible peak in the deconvoluted spectra with questionable quality.

|       | Average mass (Da) |         |         |          |         | Theoretical mass (Da) | Deviation from theoretical mass (Da) |         |         |          |         |
|-------|-------------------|---------|---------|----------|---------|-----------------------|--------------------------------------|---------|---------|----------|---------|
|       | Un-conjugated     | Low DAR | Mid DAR | High DAR | Max DAR |                       | Un-conjugated                        | Low DAR | Mid DAR | High DAR | Max DAR |
| LC    | 23047             | 23238   | 23207   | 23031    | 22948   | 23440                 | -393                                 | -202    | -233    | -409     | -492    |
| LC+1d |                   | 24607   | 24500   | 24378    | 24366   | 24757                 |                                      | -150    | -257    | -379     | -391    |
| HC    | 49730             | 50261   | 50034   |          |         | 49300                 | 430                                  | 961     | 734     |          |         |
| HC+1d | 51169             | 51459   | 51338   |          |         | 50617                 | 552                                  | 842     | 721     |          |         |
| HC+2d |                   |         |         | 52301    | 52151   | 51934                 |                                      |         |         | 367      | 217     |
| HC+3d |                   |         |         | 53491    | 53463   | 53251                 |                                      |         |         | 240      | 212     |

## RPLC-QTOF-MS

Table S2. Average mass, theoretical mass and deviation from theoretical mass for experimentally determined masses of LC and HC with different degrees of conjugation from triplicate runs of all five batches on a RPLC-QTOF-MS.

|       | Average mass (Da) |         |         |          |         | Theoretical mass (Da) | Deviation from theoretical mass (Da) |         |         |          |         |
|-------|-------------------|---------|---------|----------|---------|-----------------------|--------------------------------------|---------|---------|----------|---------|
|       | Un-conjugated     | Low DAR | Mid DAR | High DAR | Max DAR |                       | Un-conjugated                        | Low DAR | Mid DAR | High DAR | Max DAR |
| LC    | 23444             | 23443   | 23443   | 23443    |         | 23440                 | 4                                    | 3       | 3       | 3        |         |
| LC+1d |                   |         | 24760   | 24760    | 24760   | 24757                 |                                      |         | 3       | 3        | 3       |
| HC    | 49159             | 49159   | 49158   |          |         | 49300                 | -141                                 | -141    | -142    |          |         |
| HC+1d |                   | 50470   | 50473   |          |         | 50617                 |                                      | -147    | -144    |          |         |
| HC+2d |                   |         |         | 51792    |         | 51934                 |                                      |         |         | -142     |         |
| HC+3d |                   |         |         | 53109    | 53108   | 53251                 |                                      |         |         | -142     | -143    |

## RPLC-Orbitrap-MS

Table S3. Average mass, theoretical mass and deviation from theoretical mass for experimentally determined masses of LC and HC with different degrees of conjugation from triplicate runs of all five batches on a RPLC-Orbitrap-MS. Numbers marked in red indicate a visible peak in the deconvoluted spectra with questionable quality.

|       | <i>Average mass (Da)</i> |         |         |          |         | <i>Theoretical mass (Da)</i> | <i>Deviation from theoretical mass (Da)</i> |         |         |          |         |
|-------|--------------------------|---------|---------|----------|---------|------------------------------|---------------------------------------------|---------|---------|----------|---------|
|       | Un-conjugated            | Low DAR | Mid DAR | High DAR | Max DAR |                              | Un-conjugated                               | Low DAR | Mid DAR | High DAR | Max DAR |
| LC    | 23456                    | 23455   | 23455   | 23455    |         | 23440                        | 16                                          | 15      | 15      | 15       |         |
| LC+1d |                          | 24752   | 24735   |          | 24773   | 24757                        |                                             | -5      | -22     | 16       |         |
| HC    | 49224                    | 49230   | 49230   |          |         | 49300                        | -76                                         | -70     | -70     |          |         |
| HC+1d |                          | 50531   | 50549   |          |         | 50617                        |                                             | -86     | -68     |          |         |
| HC+2d |                          | 51723   | 51865   |          |         | 51934                        |                                             | -211    | -69     |          |         |
| HC+3d |                          |         |         | 53183    | 53185   | 53251                        |                                             |         |         | -68 -66  |         |

## Mass shift from conjugation

Table S4. Theoretically and experimentally determined mass shift from conjugation of one linker and drug to the light chain and heavy chain (with or without additional conjugation) as detected by each different MS-based technique.

|       | <i>MALDI-TOF-MS</i> | <i>RP-MS</i><br>( <i>QToF</i> ) | <i>RP-MS</i><br>( <i>Orbitrap</i> ) | <i>Theoretical</i> |
|-------|---------------------|---------------------------------|-------------------------------------|--------------------|
| LC+1d | 1319 Da             | 1316 Da                         | 1319 Da                             | 1317 Da            |
| HC+1d | 1608 Da             | 1313 Da                         | 1325 Da                             | 1317 Da            |
| HC+2d | 1289 Da             | 1316 Da                         | 1318 Da                             | 1317 Da            |
| HC+3d | 1244 Da             | 1316 Da                         | 1320 Da                             | 1317 Da            |
